# Supplementary material for: COL4A1 as a novel oncogene associated with the clinical characteristics of malignancy predicts poor prognosis in glioma
Source: PubMed Central journal article supplement — Exp Ther Med. 2021 Aug 27;22(5):1224. doi: 10.3892/etm.2021.10658 (PMC8438660; doi:10.3892/etm.2021.10658), 2021-08-27
Supplement: Supplementary_Data.pdf [file Supplementary_Data.pdf]

Figure S1. Confirmation of knockdown of COL4A1 expression by reverse transcription-quantitative PCR. \*\*\* $P < 0.001$  vs. COL4A1-NC. COL4A1, collagen  $\alpha$ -1 (IV) chain; MOCK, mock transfection; NC, negative control; SI, short interfering RNA.

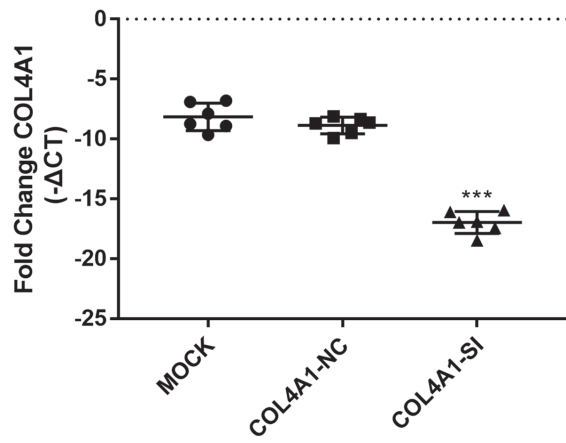

Table SI. Characteristics of patients with glioma based on the Chinese Glioma Genome Atlas.

| Item                | N (%)       |
|---------------------|-------------|
| PRS type            |             |
| Primary             | 502 (67.02) |
| Recurrent           | 222 (29.64) |
| Secondary           | 25 (3.34)   |
| Histology           |             |
| A                   | 55 (7.34)   |
| AA                  | 39 (5.21)   |
| AO                  | 22 (2.94)   |
| AOA                 | 80 (10.68)  |
| GBM                 | 176 (23.50) |
| O                   | 35 (4.67)   |
| OA                  | 95 (12.68)  |
| rA                  | 20 (2.67)   |
| rAA                 | 36 (4.81)   |
| rAO                 | 15 (2.00)   |
| rAOA                | 48 (6.41)   |
| rGBM                | 90 (12.02)  |
| rO                  | 4 (0.53)    |
| rOA                 | 9 (1.20)    |
| sGBM                | 25 (3.34)   |
| WHO grade           |             |
| II                  | 218 (29.11) |
| III                 | 240 (32.04) |
| IV                  | 291 (38.85) |
| Sex                 |             |
| Male                | 307 (40.99) |
| Female              | 442 (59.01) |
| Age (years)         |             |
| ≤41                 | 343 (45.79) |
| >41                 | 406 (54.21) |
| Radiotherapy        |             |
| Yes                 | 625 (83.44) |
| No                  | 124 (16.56) |
| Chemotherapy        |             |
| Yes                 | 520 (69.43) |
| No                  | 229 (30.57) |
| IDH mutation status |             |
| Mutant              | 410 (54.74) |
| Wild-type           | 339 (45.26) |
| 1p19q codeletion    |             |
| No                  | 155 (20.69) |
| Yes                 | 594 (79.31) |

IDH, isocitrate dehydrogenase; WHO, World Health Organization; GBM, glioblastoma multiforme; PRS, Primary, Recurrent, Secondary; A, astrocytoma; AA, anaplastic astrocytoma; AO, anaplastic oligodendroglioma; AOA, anaplastic oligoastrocytoma; GBM, glioblastoma multiforme; O, oligodendroglioma; OA, oligoastrocytoma; rA, recurrence of astrocytoma; rAA, recurrence of anaplastic astrocytoma; rAO, recurrence of anaplastic oligodendroglioma; rAOA, recurrence of anaplastic oligoastrocytoma; rGBM, recurrence of glioblastoma multiforme; rO, recurrence of oligodendroglioma; rOA, recurrence of oligoastrocytoma; sGBM, secondary glioblastoma.
